# Supplementary material for: Evolutionary Aspects of Hypericin Productivity and Endogenous Phytohormone Pools Evidenced in Hypericum Species In Vitro Culture Model
Source: MDPI journal article supplement (doi:10.3390/plants11202753), 2022-10-18
Supplement: s1 [file s1]

## SUUPLEMENTARY MATERIAL

# Evolutionary aspects of hypericin productivity and endogenous phytohormone pools evidenced in *Hypericum* species *in vitro* culture model

Kalina Danova <sup>1,\*</sup>, Vaclav Motyka <sup>2,\*</sup>, Antoaneta Trendafilova <sup>1</sup>, Petre I. Dobrev <sup>2</sup>, Viktorya Ivanova <sup>1</sup> and Ina Aneva

<sup>1</sup> Institute of Organic Chemistry with Centre of Phytochemistry, Bulgarian Academy of Sciences, Acad. Georgi Bonchev Str., bl.9, 1113 Sofia, Bulgaria

<sup>2</sup> Institute of Experimental Botany of the Czech Academy of Sciences, Rozvojová 263, CZ-165 02 Prague 6, Czech Republic

<sup>3</sup> Institute of Biodiversity and Ecosystem Research, Bulgarian Academy of Sciences, 2 Gagarin Str., 1113 Sofia, Bulgaria

\* Correspondence: k\_danova@abv.bg; Motyka@ueb.cas.cz

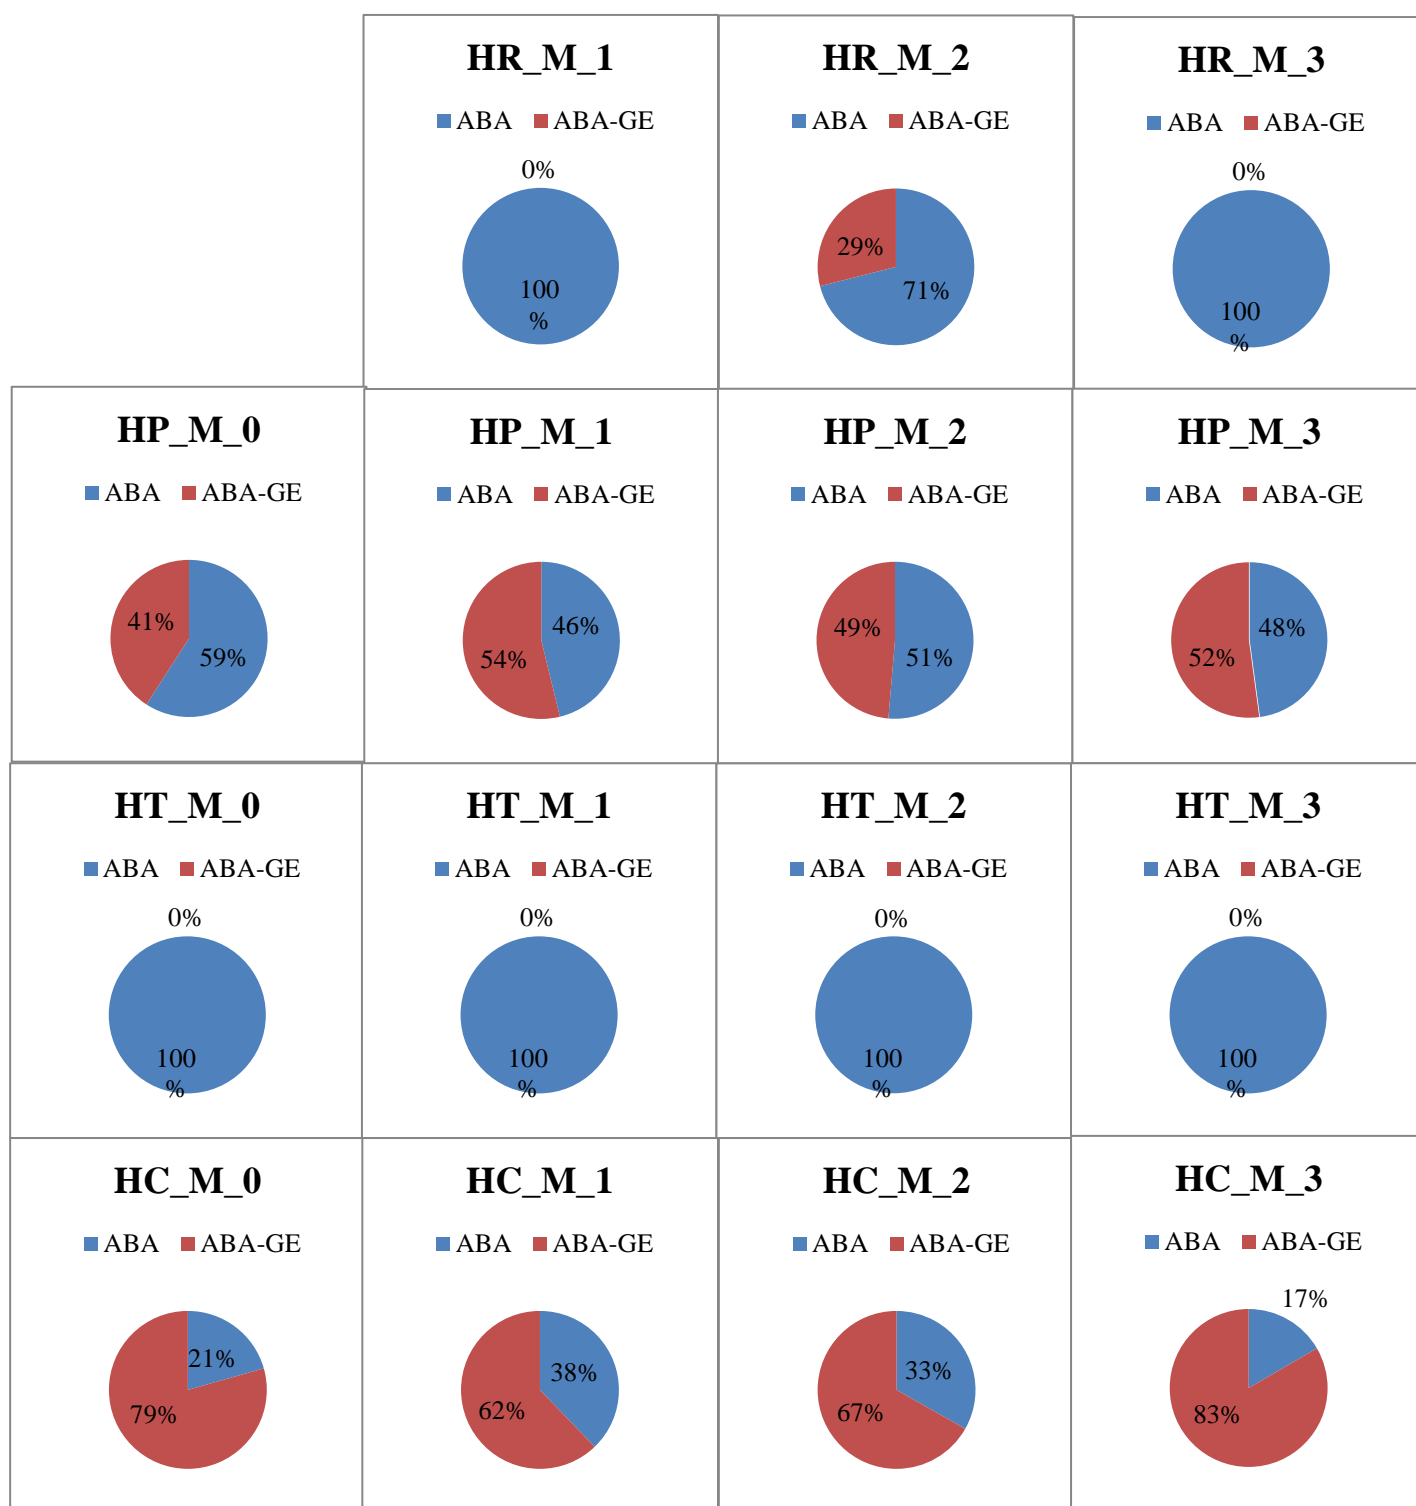

**Figure S1.** Proportional representation of abscisic acid (ABA) and its storage conjugate ABA-glucose ester (ABA-GE) in the four *Hypericum* species in M\_0 - PGR-free, M\_1 - 0.2 mg/l BA, M\_2 - 0.2 mg/l BA + 0.1 mg/l IBA and M\_3 - 0.1 mg/l BA + 0.2 mg/l IBA supplemented media, *HR* – *H. richeri* Vill., *HP* – *H. perforatum* L., *HT* – *H. tetrapterum* Fries. and *HC* – *H. calycinum*.

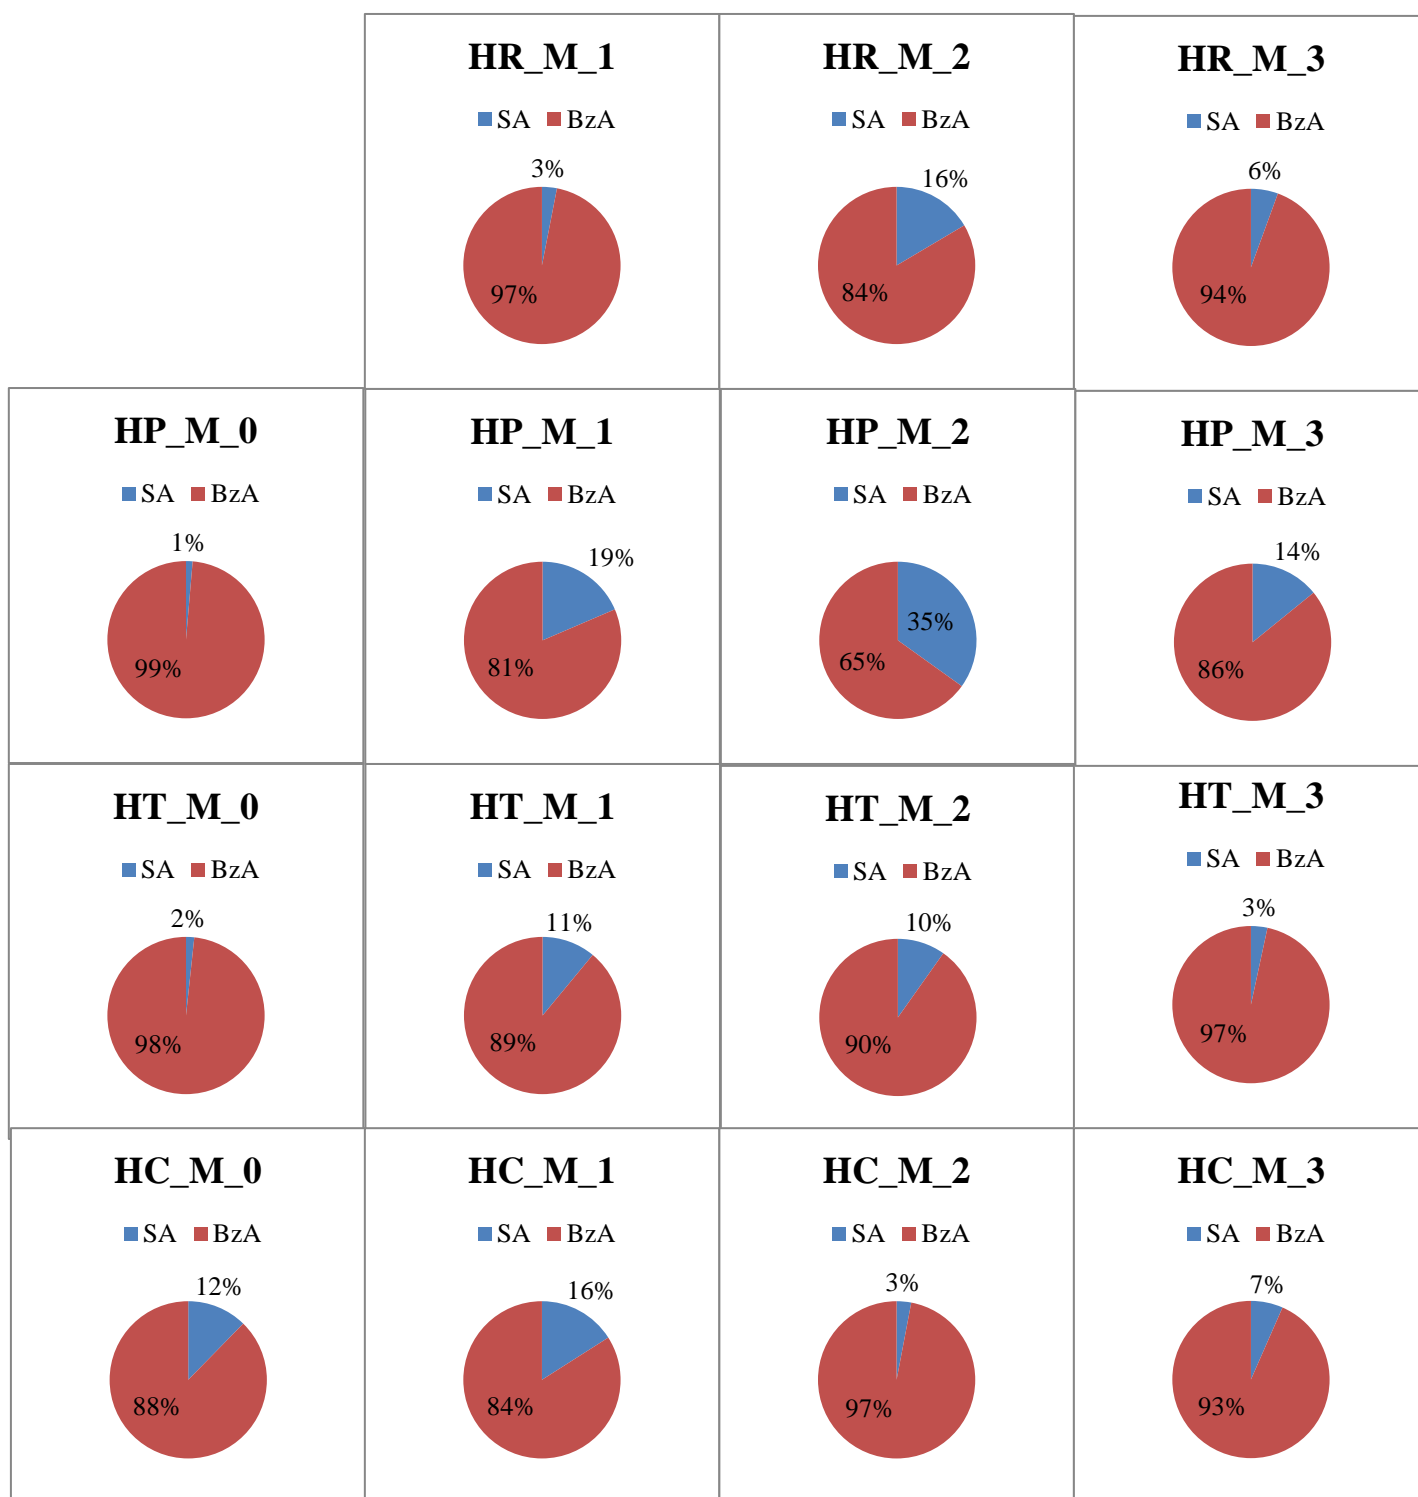

**Figure S2.** Proportional representation of salicylic (SA) and benzoic (BA) acids in the four *Hypericum* species in M\_0 - PGR-free, M\_1 - 0.2 mg/l BA, M\_2 - 0.2 mg/l BA + 0.1 mg/l IBA and M\_3 - 0.1 mg/l BA + 0.2 mg/l IBA supplemented media, *HR* – *H. richeri* Vill., *HP* – *H. perforatum* L., *HT* – *H. tetrapterum* Fries. and *HC* – *H. calycinum*.

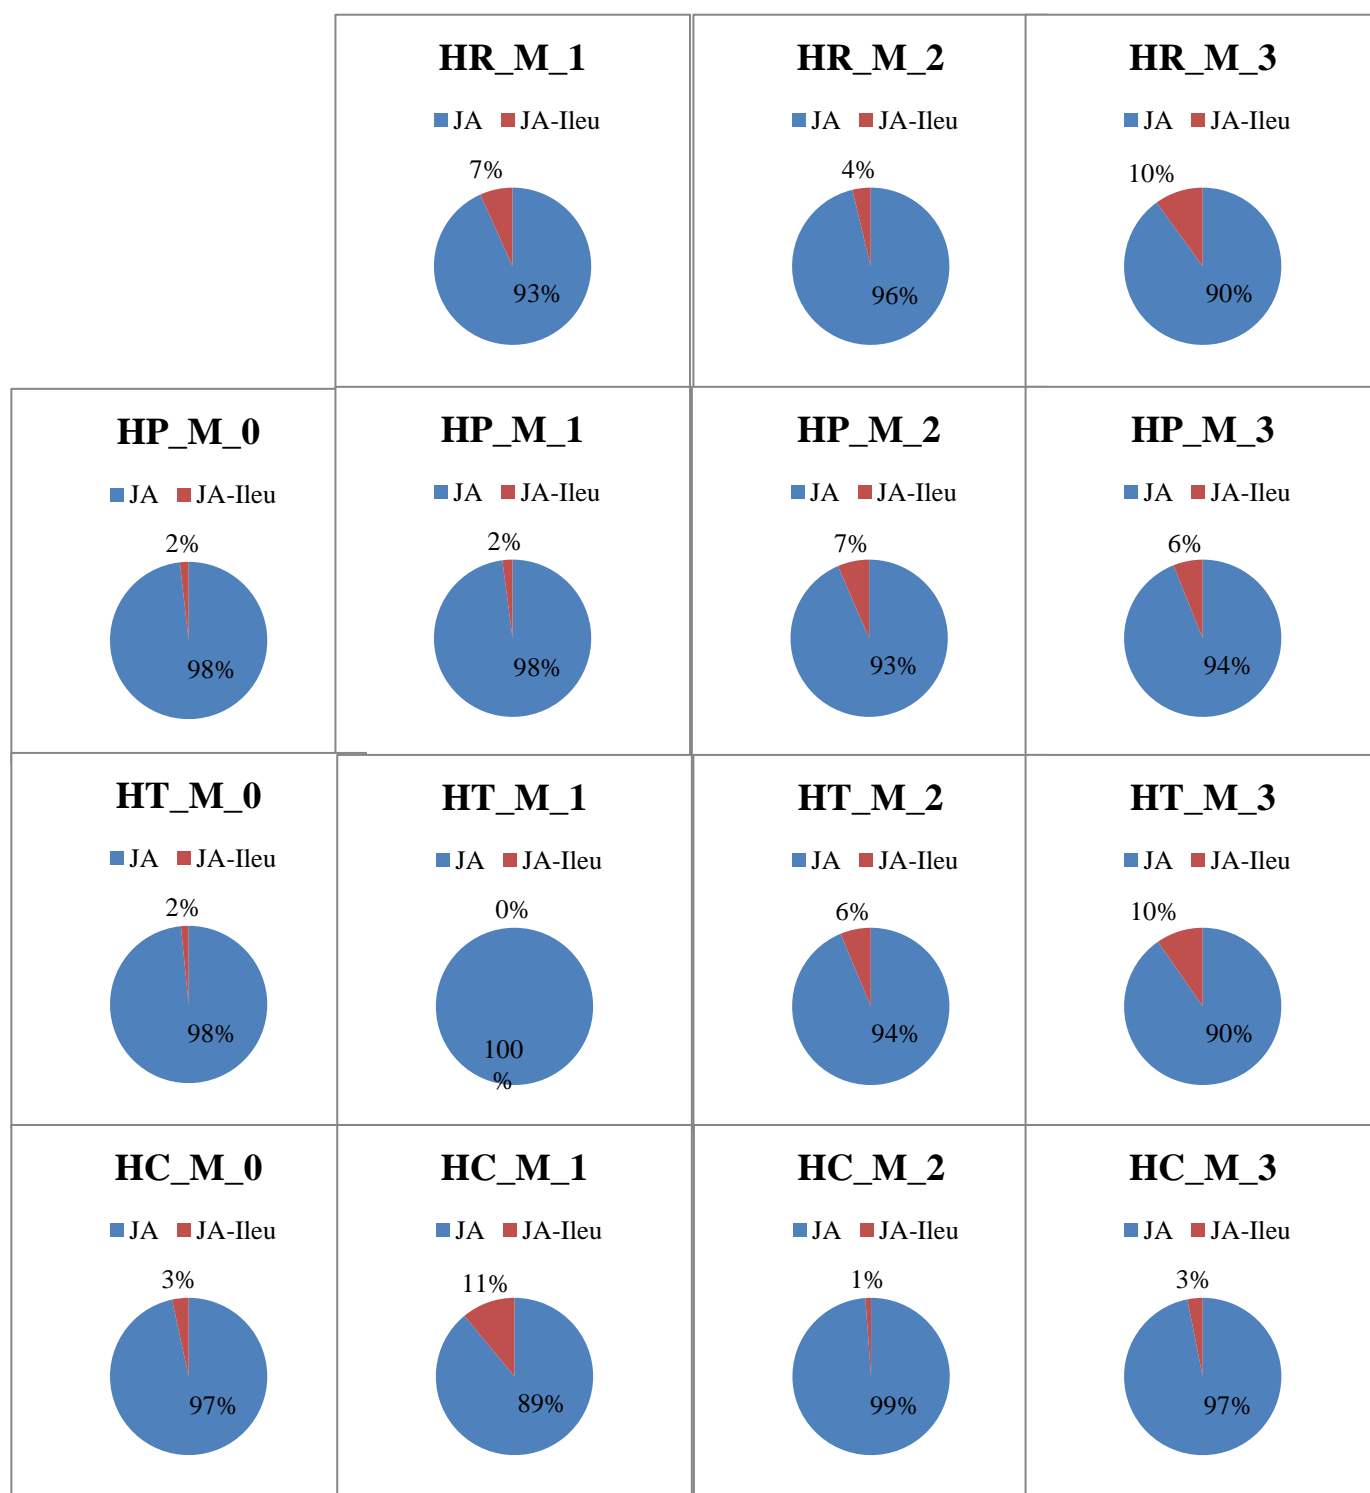

**Figure S3.** Proportional representation of jasmonic acid (JA) and its bioactive conjugate JA-isoleucine (Ja-Ileu) in the four *Hypericum* species in M\_0 - PGR-free, M\_1 - 0.2 mg/l BA, M\_2 - 0.2 mg/l BA + 0.1 mg/l IBA and M\_3 - 0.1 mg/l BA + 0.2 mg/l IBA supplemented media, HR – *H. richeri* Vill., HP – *H. perforatum* L., HT – *H. tetrapterum* Fries. and HC – *H. calycinum*.

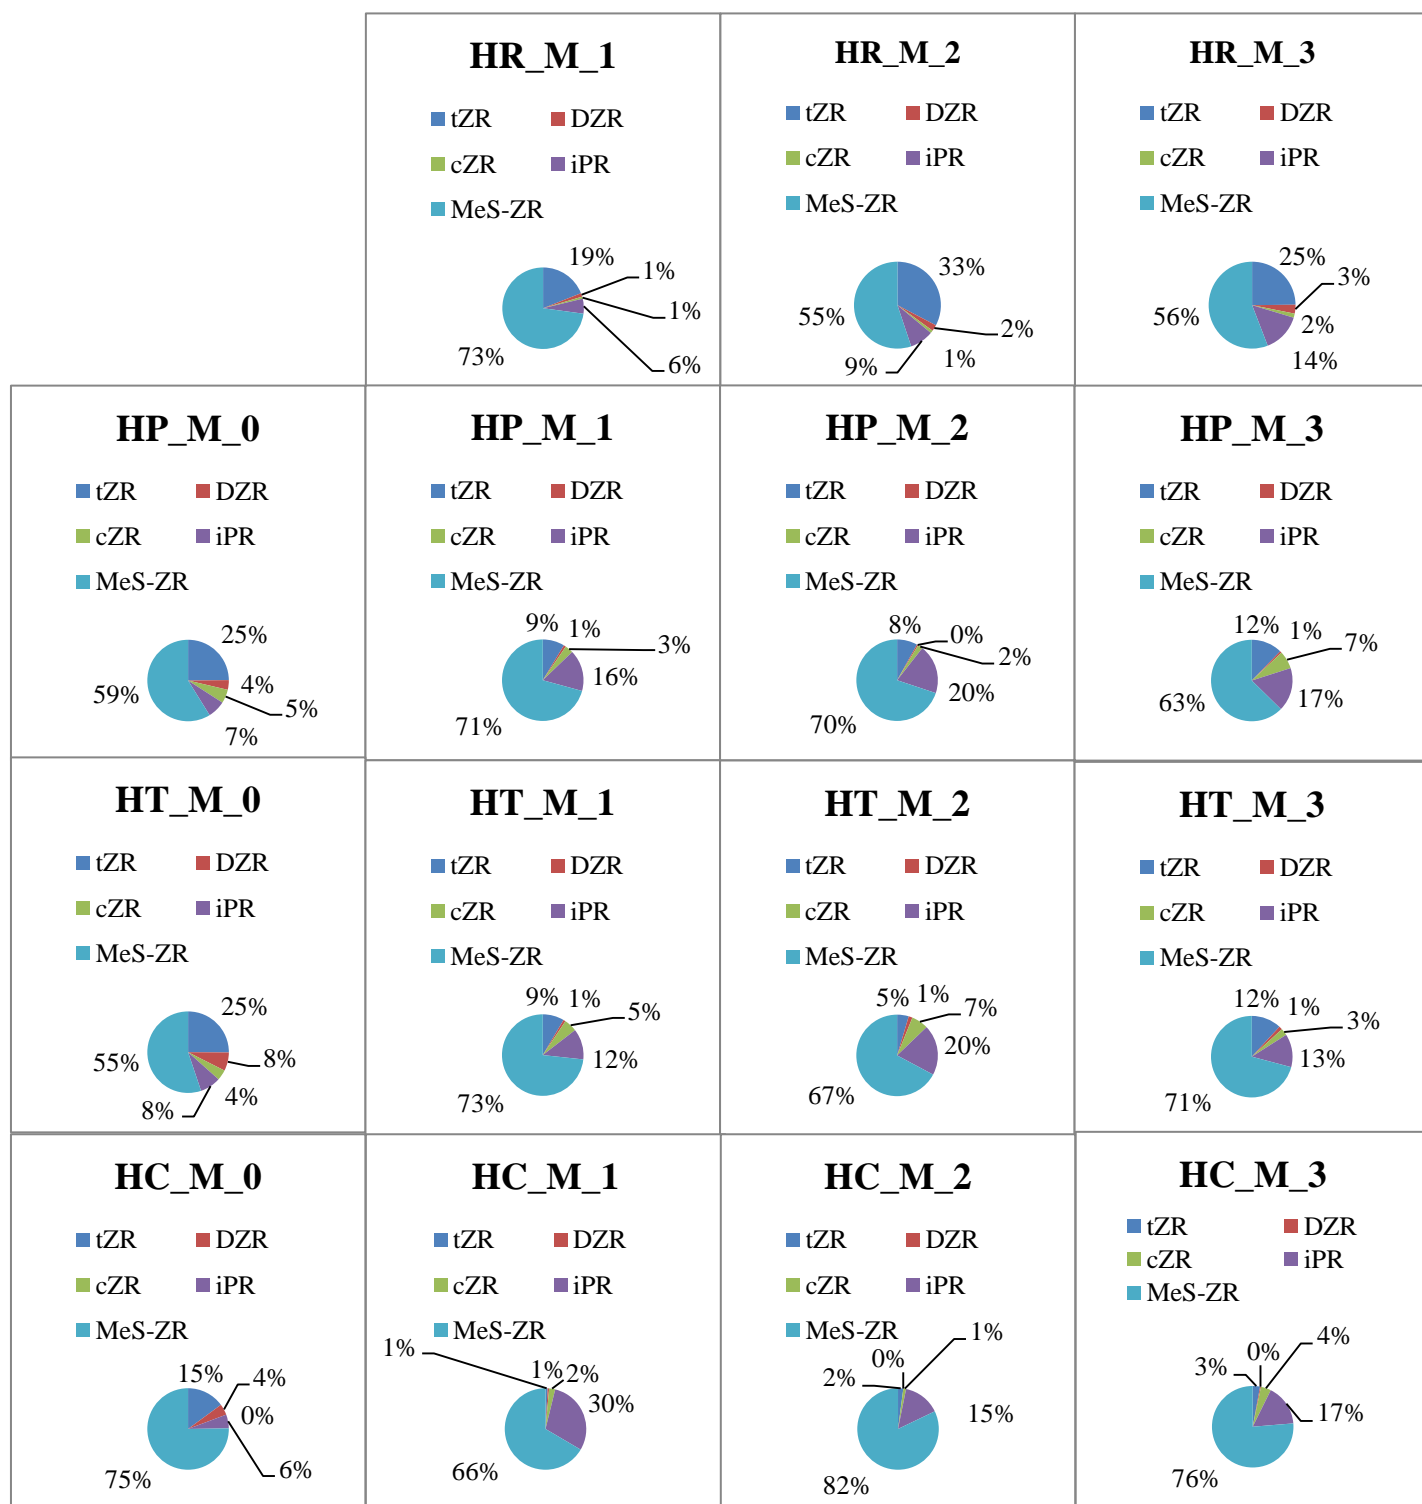

**Figure S4.** Proportional representation of cytokinin ribosides in the four *Hypericum* species in M\_0 - PGR-free, M\_1 - 0.2 mg/l BA, M\_2 - 0.2 mg/l BA + 0.1 mg/l IBA and M\_3 - 0.1 mg/l BA + 0.2 mg/l IBA supplemented media, HR – *H. richeri* Vill., HP – *H. perforatum* L., HT – *H. tetrapterum* Fries. and HC – *H. calycinum*.
